# Supplementary material for: Brain-Wide Synaptic Inputs to Aromatase-Expressing Neurons in the Medial Amygdala Suggest Complex Circuitry for Modulating Social Behavior
Source: eNeuro. 2022 Mar 11;9(2):ENEURO.0329-21.2021. doi: 10.1523/ENEURO.0329-21.2021 (PMC8925724; doi:10.1523/ENEURO.0329-21.2021)
Supplement: Table 2-1 — Hypothalamic inputs to arom+ cells in the MeA. Download Table 2-1, XLSX file. [file enu-eN-NWR-0329-21-s11.xlsx]

## Sheet: Sheet1
Periventricular region	Periventricular zone	Hypothalamic medial zone	Hypothalamic lateral zone
Anterodorsal preoptic nucleus	Paraventricular hypothalamic nucleus	Anterior hypothalamic nucleus	Lateral Hypothalamic area
Anteroventral preoptic nucleus	Periventricular hypothalamic nucleus, anterior	Medial mammillary nucleus	Lateral preoptic area
Anteroventral periventricular nucleus	Periventricular hypothalamic nucleus, intermediate	Supramammillary nucleus	Parasubthalamic nucleus
Dorsomedial nucleus of the hypothalamus	Arcuate hypothalamic nucleus	Tuberomammilary nucleus	Perifornical nucleus
Medial preoptic area		Medial preoptic nucleus	Retrochiasmatic area
Posterodorsal preoptic nucleus		Dorsal premammillary nucleus	Subthalamic nucleus
Parastrial nucleus		Ventral premammillary nucleus	Tuberal nucleus
Periventricular hypothalamic nucleus, posterior		Ventromedial hypothalamic nucleus	Zona incerta
Periventricular hypothalamic nucleus, preoptic		Posterior hypothalamic nucleus
Ventrolateral preoptic nucleus
